# Supplementary material
Source: Springer Nature journal article supplement (https://www.springermedizin.de/resource/supplementary/12885_2012_4027_MOESM15_ESM.pdf/9465002)

# Live Tissue

**A**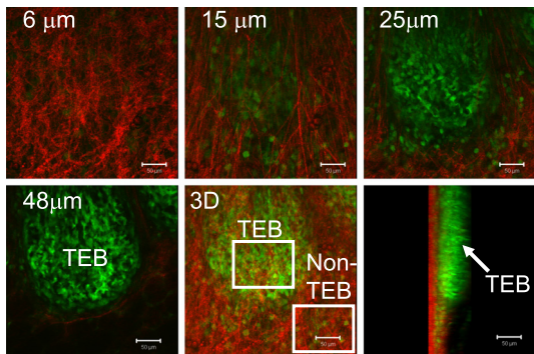**B**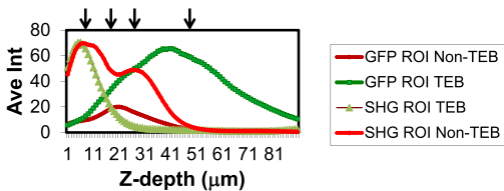**C**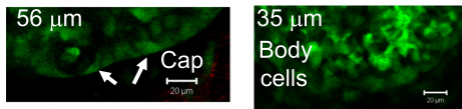**D**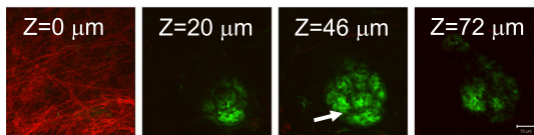

Supplement: MOESM15 [file 9465002]
